# Supplementary material for: Characterization of Clostridioides difficile Strains, the Disease Severity, and the Microbial Changes They Induce
Source: MDPI journal article supplement (doi:10.3390/jcm9124099), 2020-12-18
Supplement: s1 [file s1]

**Table S1.** Association between binary toxin gene presence and demographics data.

| Characteristic                | Non-binary ( <i>n</i> = 61) | Binary ( <i>n</i> = 9) | p-value |
|-------------------------------|-----------------------------|------------------------|---------|
| Age                           |                             |                        |         |
| <65                           | 10 (16.4%)                  | 0 (0%)                 | 0.349   |
| 75–65                         | 23 (37.7%)                  | 5 (55.5%)              |         |
| 75+                           | 28 (45.9%)                  | 4 (44.5%)              |         |
| Gender                        |                             |                        |         |
| Male                          | 29 (47.5%)                  | 5 (55.5%)              | 0.653   |
| Female                        | 32 (52.5%)                  | 4 (44.5%)              |         |
| Nosocomial/Community-acquired |                             |                        |         |
| Nosocomial                    | 42 (68.9%)                  | 6 (66.7%)              | 0.895   |
| Community                     | 19 (31.1%)                  | 3 (33.3%)              |         |
| Death in hospital             |                             |                        |         |
| Alive                         | 43 (70.5%)                  | 5 (55.5%)              | 0.368   |
| Died                          | 18 (29.5%)                  | 4 (44.5%)              |         |
